# Supplementary material for: Advances in the methodology of a multicomponent synthesis of arylnaphthalene lactones
Source: Royal Society of Chemistry journal article supplement (doi:10.1039/b913685a), 2010-01-01
Supplement: b913685a.pdf [file b913685a.pdf]

Supplementary Material (ESI) for Green Chemistry  
This journal is © The Royal Society of Chemistry 2010

One-Pot Synthesis of Dehydrodimethylconidendrin

Patrick Foley, Nicolas Eghbali and Paul Anastas\*

Center for Green Chemistry and Green Engineering at Yale, Yale Chemistry Department,  
225 prospect Street, New Haven, CT, 06511

Paul.Anastas@yale.edu

Supplementary Information: Green Chemistry Metrics – Table 3

**The Original Synthesis:**

*Anastas, Weber, and Stevenson's approach to arynaphthalene lactones:  
3 total steps calculated*

**E-factor**

*Steps 1 & 2:*

| <u>Input</u>                                 | <u>Mass(kg)</u> |
|----------------------------------------------|-----------------|
| 3,4-Dimethoxyphenyl propionic acid (SM 1)    | 1.71            |
| Thionyl chloride (TC)                        | 16.57           |
| 3,4-Dimethoxyphenyl propargyl alcohol (SM 2) | 1.53            |
| P4-VP ploymer (resin)                        | 3.80            |
| Dichloromethane (DCM)                        | 100.69          |

Output

|                                                                       |     |
|-----------------------------------------------------------------------|-----|
| 3,4-dimethoxyphenylpropargyl<br>3,4-dimethoxyphenylpropiolate<br>(DP) | 2.2 |
|-----------------------------------------------------------------------|-----|

Waste

$W_{1,2} = ((1.71 \text{ kg SM 1}) + (1.53 \text{ kg SM2}) - 2.2 \text{ kg DP}) + 16.57 \text{ kg TC} + 3.80 \text{ kg resin} + 100.69 \text{ kg DCM} = 122.1 \text{ kg waste from steps 1 \& 2}$

*Step 3:*

| <u>Input</u>                                                            | <u>Mass (kg)</u> |
|-------------------------------------------------------------------------|------------------|
| 3,4-dimethoxyphenylpropargyl<br>3,4-dimethoxyphenylpropionate<br>(SM 3) | 2.20             |

Xylenes 15.80

#### Output

Desired Product 1.0

#### Waste

$W_3 = (2.2 \text{ kg SM 3} - 1 \text{ kg Desired Product}) + 15.8 \text{ kg xylenes} = 17 \text{ kg waste from step 3}$

#### Calculated E-factor:

$E\text{-factor} = (122.1 \text{ kg } W_{1,2} + 17 \text{ kg } W_3) / 1 \text{ kg desired product} = 139.1$

#### **Atom Economy**

$AE (\%) = (\text{MW Product} / \Sigma \text{MW of Reagents}) \times 100$

| <u>Reagent</u>                           | <u>MW</u> |
|------------------------------------------|-----------|
| 3,4-Dimethoxyphenyl<br>propionic acid    | 206.06    |
| 3,4-Dimethoxyphenyl<br>propargyl alcohol | 192.08    |
| Thionyl Chloride                         | 118.97    |

#### Product

Dehydrodimethyl-  
conidendrin 380.13

$AE (\%) = (380.13 / (206.06 + 192.08 + 118.97)) \times 100 = 73.5 \%$

**The Improved Synthesis:**  
*Reported in this publication*  
*2 steps total*

**E-factor**

**Step 1:**

| <u>Input</u>                                 | <u>Mass (kg)</u> |
|----------------------------------------------|------------------|
| 3,4-Dimethoxyphenyl propargyl alcohol (SM 1) | 1.09             |
| Thionyl Chloride (TC)                        | 0.73             |
| N,N-Dimethylacetamide (DMA)                  | 16.70            |
| <u>Output</u>                                |                  |
| 3,4-Dimthoxyphenyl propargyl chloride (DP 1) | 1.00             |

Waste

$$W_1 = ((1.09 \text{ kg SM 1}) + (0.73 \text{ kg TC}) - 1.0 \text{ kg DP}) + 16.70 \text{ kg DMA} = 17.5 \text{ kg waste from step 1}$$

**Step 2:**

| <u>Input</u>                                  | <u>Mass (kg)</u> |
|-----------------------------------------------|------------------|
| 3,4-Dimethoxyphenyl propargyl chloride (SM 2) | 1.00             |
| 3,4-Dimethoxyphenyl acetylene (SM 3)          | 0.77             |
| Potassium carbonate (Base)                    | 0.67             |
| 18-Crown-6 (PTC)                              | 0.26             |
| Carbon dioxide (CO <sub>2</sub> )             | 3.14             |
| Silver Iodide (AgI)                           | 0.11             |

N,N-Dimethylacetamide  
(DMA) 12.53

Output

Dehydrodimethyl-  
conidendrin (DP 2) 1.0

Waste

$W_2 = ((1.0 \text{ kg SM } 2) + (0.77 \text{ kg SM } 2) - (1.00 \text{ kg DP } 2)) + 0.67 \text{ kg Base} + 0.26 \text{ kg PTC} + 3.14 \text{ kg CO}_2 + 0.11 \text{ kg AgI} + 12.53 \text{ kg DMA} = 17.48 \text{ kg waste from step 2}$

Calculated E-factor

E-factor =  $(17.50 \text{ kg } W_1 + 17.48 \text{ kg } W_2) / 1 \text{ kg Desired Product} = 34.98$

**Atom Economy**

$AE (\%) = (\text{MW Product} / \Sigma \text{MW of Reagents}) \times 100$

| <u>Reagent</u>                        | <u>MW</u> |
|---------------------------------------|-----------|
| 3,4-Dimethoxyphenyl acetylene         | 162.07    |
| 3,4-Dimethoxyphenyl propargyl alcohol | 192.08    |
| Thionyl Chloride                      | 118.97    |
| Carbon dioxide                        | 43.99     |

Product

Dehydrodimethyl-  
conidendrin 380.13

$AE (\%) = (380.13 / (162.07 + 192.08 + 118.97 + 43.99)) \times 100 = 73.5\%$
